# Supplementary material for: Geometry Shapes Propagation: Assessing the Presence and Absence of Cortical Symmetries through a Computational Model of Cortical Spreading Depression
Source: PubMed Central journal article supplement (PMC4735361; doi:10.3389/fncom.2016.00006), 2016-02-02
Supplement: Presentation1.pdf [file Presentation1.pdf]

## ***Supplementary Material:***

# **Geometry shapes propagation: assessing the presence and absence of cortical symmetries through a computational model of cortical spreading depression**

**Julia M. Kroos\*, Ibai Diez, Jesus M. Cortes, Sebastiano Stramaglia and Luca Gerardo-Giorda**

\*Correspondence:

Julia M. Kroos

BCAM – Basque Center for Applied Mathematics, Alameda de Mazarredo 14,

E48009 Bilbao, Basque Country – Spain

jkroos@bcamath.org

## **1 SUPPLEMENTARY MATERIAL**

### **1.1 Numerical Approximation of the Distributed Model**

For the time discretization of the model

$$\frac{\partial u}{\partial t} = -I(u, w) + \operatorname{div}(D\nabla u) \quad (1)$$

$$I(u, w) = G(u - u_0) \left(1 - \frac{u}{u_{th}}\right) \left(1 - \frac{u}{u_p}\right) + \eta_1(u - u_0)w \quad (2)$$

$$\frac{\partial w}{\partial t} = \eta_2(u - u_0 - \eta_3 w), \quad (3)$$

we consider a uniform mesh in the time variable  $t$  and define  $t^n = n\Delta t$  for  $n = 0, \dots, N$  with the time step  $\Delta t = T/N$  and  $t \in [0, T]$ . In the following  $u^n$  denotes the discrete evaluation of  $u$  at time  $t^n$ . Next we apply the backward Euler method to the time derivative obtaining:

$$\frac{\partial u}{\partial t}(t^{n+1}) \sim \frac{u^{n+1} - u^n}{\Delta t}.$$

Applying this to (1) we are left with the problem

$$u^{n+1} - \Delta t \nabla(D\nabla u^{n+1}) = -\Delta t I^{n+1} + \Delta t u^n.$$

For the finite dimensional approximation in space we first set up the variational formulation of our problem (1). Let  $H^1(\Omega)$  be the Sobolev space over  $\Omega \subset \mathbb{R}^2$ . Then the variational formulation of (1) is

$$\begin{aligned} &\text{Given } u^0, w^0 \in L^2(\Omega) \text{ and } I \in L^2(\Omega \times (0, T)) \\ &\text{find } u^{n+1} \in V_h \text{ such that for all } t \in (0, T) : \\ &\int_{\Omega} u^{n+1} \phi_j + \Delta t \int_{\Omega} D \nabla u^{n+1} \nabla \phi_j = \Delta t \int_{\Omega} u^n \phi_j - \Delta t \int_{\Omega} I^{n+1} \phi_j, \forall \phi_j \in V_h \end{aligned} \quad (4)$$

for each  $n = 0, \dots, N - 1$ . Let  $\mathcal{T}_h$  be a triangulation of  $\Omega$ , which implies  $\Omega = \bigcup_{K \in \mathcal{T}_h} K$ . We define  $h$  as the maximum diameter of the triangles. For reasons of simplicity we assume that every triangle  $K$  can be obtained by applying a suitable invertible affine map to a reference triangle  $\hat{K}$ , thus  $K = T_K(\hat{K})$ . The corresponding finite element spaces are defined as

$$X_h^1 = \{v_h \in C^0(\Omega) | v_h|_K \circ T_K \in \mathbb{P}_1, \forall K \in \mathcal{T}_h\}$$

where  $\mathbb{P}_1$  is the space of polynomials of degree less than or equal to one. For a more detailed introduction to finite element methods see (Quarteroni and Valli, 1997).

For the approximation of our problem we apply the Galerkin method selecting the finite dimensional space  $V_h = X_h^1$  and its basis  $\{\varphi_j(x) | j = 1, \dots, N_h\}$ , where  $N_h$  is the dimension of  $V_h$ . With this we can set

$$u_h^n = \sum_{i=1}^{N_h} u_{h,i}^n \varphi_i(x).$$

Following the Green formula of integration we can deduce from the variational formulation (4):

$$\begin{aligned} &\sum_{i=1}^{N_h} u_{h,i}^{n+1} \sum_{K \in \mathcal{T}_h} \int_K \varphi_i(x) \varphi_j(x) dx + \Delta t \sum_{i=1}^{N_h} u_{h,i}^{n+1} \sum_{K \in \mathcal{T}_h} \int_K (\nabla \varphi_i(x))^T D \nabla \varphi_j(x) dx = \\ &\Delta t \sum_{i=1}^{N_h} u_{h,i}^n \sum_{K \in \mathcal{T}_h} \int_K \varphi_i(x) \varphi_j(x) dx - \Delta t \sum_{i=1}^{N_h} I_h^{n+1} \sum_{K \in \mathcal{T}_h} \int_K \varphi_i(x) \varphi_j(x) dx. \end{aligned} \quad (5)$$

Defining the mass and stiffness matrix as  $M = (m_{ij})$  and  $S = (s_{ij})$  with

$$m_{ij} = \sum_{K \in \mathcal{T}_h} \int_K \varphi_i(x) \varphi_j(x) dx \quad \text{and} \quad s_{ij} = \sum_{K \in \mathcal{T}_h} \int_K (\nabla \varphi_i(x))^T D \nabla \varphi_j(x) dx$$

the finite element approximation reads

$$(M + \Delta t S) u^{n+1} = M u^n - \Delta t M I^{n+1}.$$

The integrals in mass and stiffness matrix are evaluated by a third order Gauss rule. The equation for the recovery variable  $w$  in (3) can be solved explicitly as follows

$$\begin{aligned} w(t) &= \left( w(t_0) + \int_{t_0}^t \eta_2(u - u_0) \exp \left( \int_{t_0}^x \eta_2 \eta_3 d\xi \right) dx \right) \exp \left( - \int_{t_0}^t \eta_2 \eta_3 dx \right) \\ &= \frac{u - u_0}{\eta_3} + \left( w(t_0) - \frac{u - u_0}{\eta_3} \right) \exp(-\eta_2 \eta_3 (t - t_0)). \end{aligned}$$

For the full discretisation of the model (1) - (3) we use an implicit-explicit (IMEX) scheme to advance from  $t^n$  to  $t^{n+1}$ : the recovery variable  $w^{n+1}$  is updated by solving explicitly (after linearization around  $u^n$ ) equation (3) in  $(0, \Delta t)$  and plugged into the expression of  $I(u, w)$  for the computation of  $u^{n+1}$ . The overall procedure can be summarized as follows

Given  $u^n$  and  $w^n$ ,

$$\text{update: } w^{n+1} = \frac{u^n - u_0}{\eta_3} + \left( w^n - \frac{u^n - u_0}{\eta_3} \right) \exp(-\eta_2 \eta_3 \Delta t)$$

$$\text{update: } I^{n+1} = I(u^n, w^{n+1})$$

$$\text{solve: } Au^{n+1} = Mu^n - \Delta t M I^{n+1}$$

where  $A := M + \Delta t S$ , where  $M$  and  $S$  are the classical finite elements mass and stiffness matrices.

## REFERENCES

Quarteroni, A. and Valli, A. (1997). *Numerical Approximation of Partial Differential Equations* (Springer-Verlag Berlin Heidelberg), 2 edn.

## 2 SUPPLEMENTARY TABLES AND FIGURES

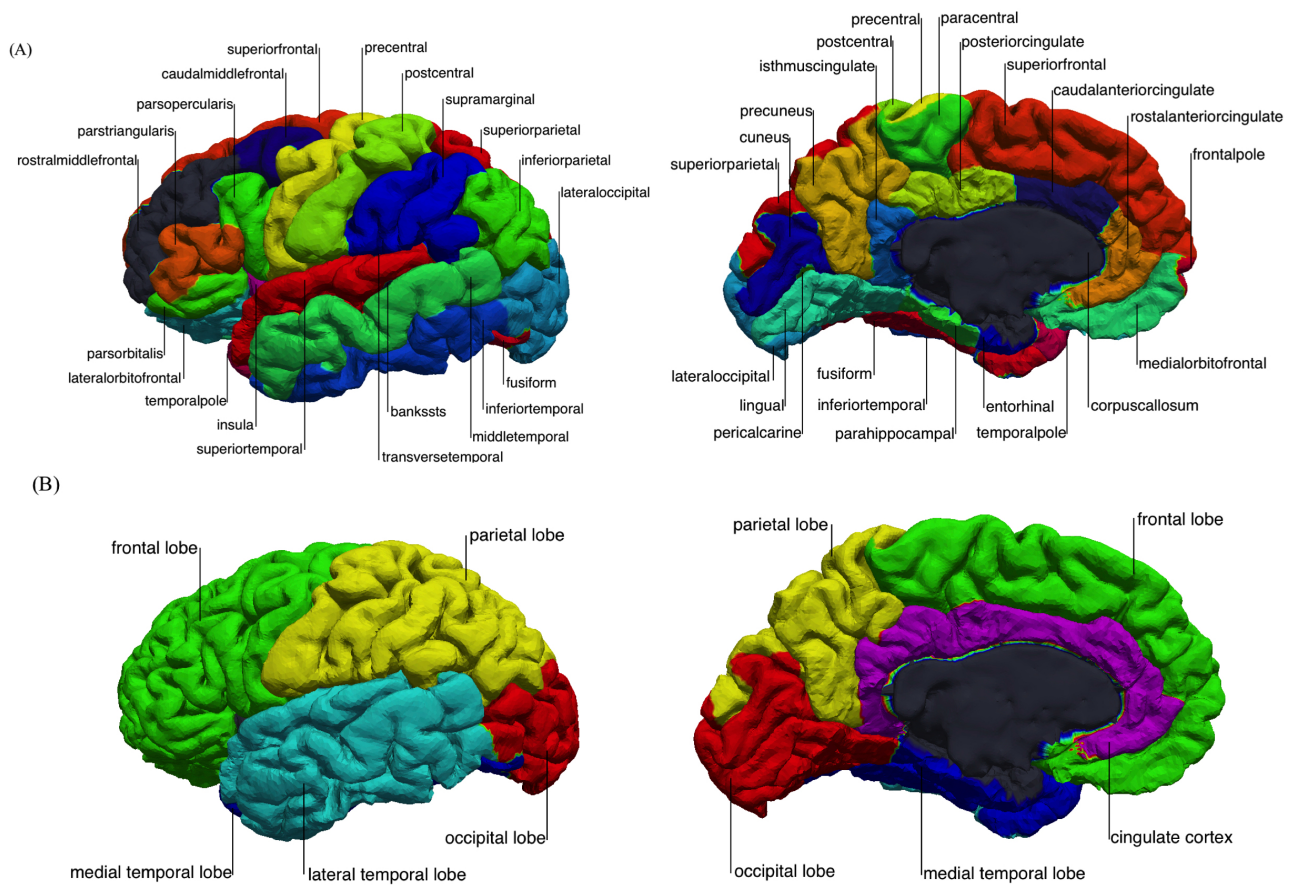

**Supplementary Figure 1.** The structural compartments (A) and the location of the lobes (B) on the lateral and medial surface of the cerebral cortex (left hemisphere).
